# Supplementary material for: Synthesis, structure, and magnetic properties of new layered phosphate halides Sr2Cu5(PO4)4X2·8H2O (X = Cl, Br) with a crown-like building unit
Source: Royal Society of Chemistry journal article supplement (doi:10.1039/c7dt00046d), 2017-01-01
Supplement: c7dt00046d1.pdf [file c7dt00046d1.pdf]

## Supporting Information

### Synthesis, structure, and magnetic properties of new layered phosphate halides $\text{Sr}_2\text{Cu}_5(\text{PO}_4)_4\text{X}_2 \cdot 8\text{H}_2\text{O}$ ( $\text{X} = \text{Cl}, \text{Br}$ ) with a crown-like building unit

Chaoqun Qiu<sup>†,§</sup>, Zhangzhen He<sup>†,\*</sup>, Meiyang Cui<sup>†,§</sup>, Yingying Tang<sup>†</sup>, and Sihuai Chen<sup>†</sup>

<sup>†</sup>State Key Laboratory of Structural Chemistry, Fujian Institute of Research on the Structure of Matter, Chinese Academy of Sciences, Fuzhou, Fujian 350002, China.

<sup>§</sup>University of the Chinese Academy of Sciences, Beijing, 100039, China.

\*E-mail: [hc1988@hotmail.com](mailto:hc1988@hotmail.com); [hezz@fjirsm.ac.cn](mailto:hezz@fjirsm.ac.cn)

**Figure S1.** Experimental (Black line) and Simulated (Red line) powder X-ray diffraction patterns of  $\text{Sr}_2\text{Cu}_5(\text{PO}_4)_4\text{X}_2 \cdot 8\text{H}_2\text{O}$  [ $\text{X} =$  (a) Cl and (b) Br].

**Figure S2.** The  $\chi^{-1}$  versus  $T$  curves of  $\text{Sr}_2\text{Cu}_5(\text{PO}_4)_4\text{X}_2 \cdot 8\text{H}_2\text{O}$  [ $\text{X} =$  (a) Cl and (b) Br].

**Figure S3.** The fit of square-lattice Heisenberg antiferromagnetic spin model for magnetic susceptibility data of  $\text{Sr}_2\text{Cu}_5(\text{PO}_4)_4\text{X}_2 \cdot 8\text{H}_2\text{O}$  [ $\text{X} =$  (a) Cl and (b) Br].

**Table S1.** The Wyckoff positions, atomic coordinates ( $\times 10^4$ ) and equivalent isotropic displacement parameters ( $\text{\AA}^2 \times 10^3$ ) for  $\text{Sr}_2\text{Cu}_5(\text{PO}_4)_4\text{X}_2 \cdot 8\text{H}_2\text{O}$  ( $\text{X} = \text{Cl}$  and Br).  $U(\text{eq})$  is defined as one third of the trace of the orthogonalized  $U_{ij}$  tensor.

**Table S2.** Anisotropic displacement parameters ( $\text{\AA}^2 \times 10^3$ ) for  $\text{Sr}_2\text{Cu}_5(\text{PO}_4)_4\text{X}_2 \cdot 8\text{H}_2\text{O}$  ( $\text{X} = \text{Cl}$  and Br). The anisotropic displacement factor exponent takes the form:  $-2 \pi^2 [h^2 a^{*2} U_{11} + \dots + 2 h k a^* b^* U_{12}]$ .

**Table S3.** Bond lengths [ $\text{\AA}$ ] and angles [deg] for  $\text{Sr}_2\text{Cu}_5(\text{PO}_4)_4\text{Cl}_2 \cdot 8\text{H}_2\text{O}$ .

**Table S4.** Bond lengths [ $\text{\AA}$ ] and angles [deg] for  $\text{Sr}_2\text{Cu}_5(\text{PO}_4)_4\text{Br}_2 \cdot 8\text{H}_2\text{O}$ .

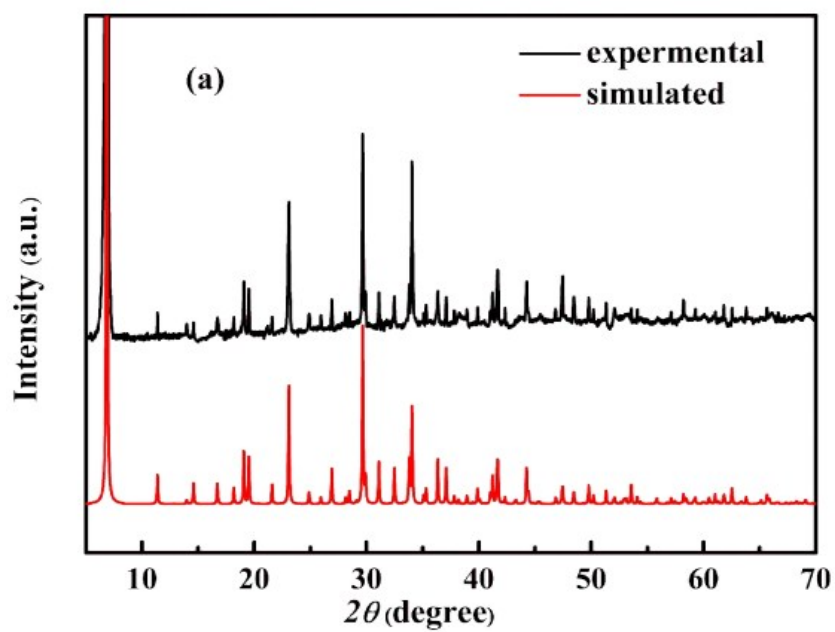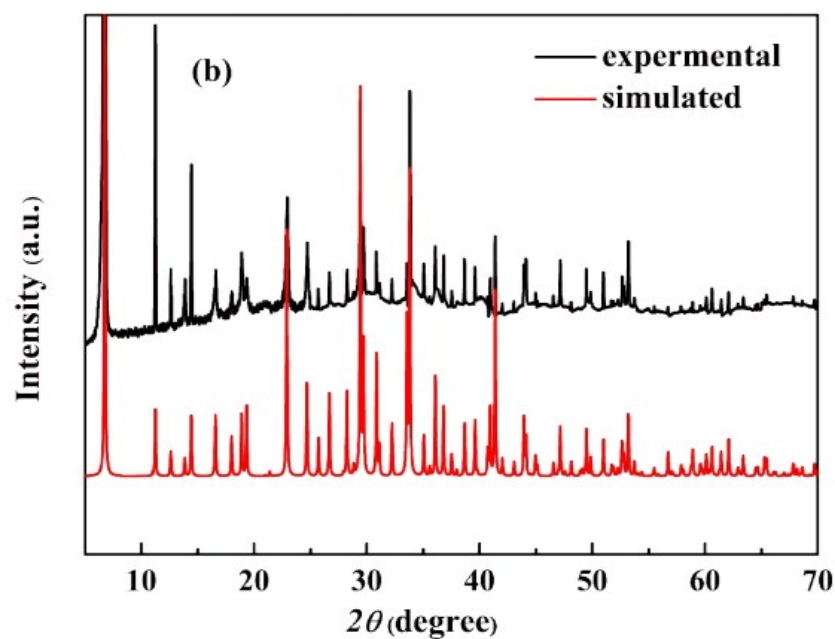

**Figure S1.** Experimental (Black line) and Simulated (Red line) powder X-ray diffraction patterns of  $\text{Sr}_2\text{Cu}_5(\text{PO}_4)_4\text{X}_2 \cdot 8\text{H}_2\text{O}$  [X = (a) Cl and (b) Br].

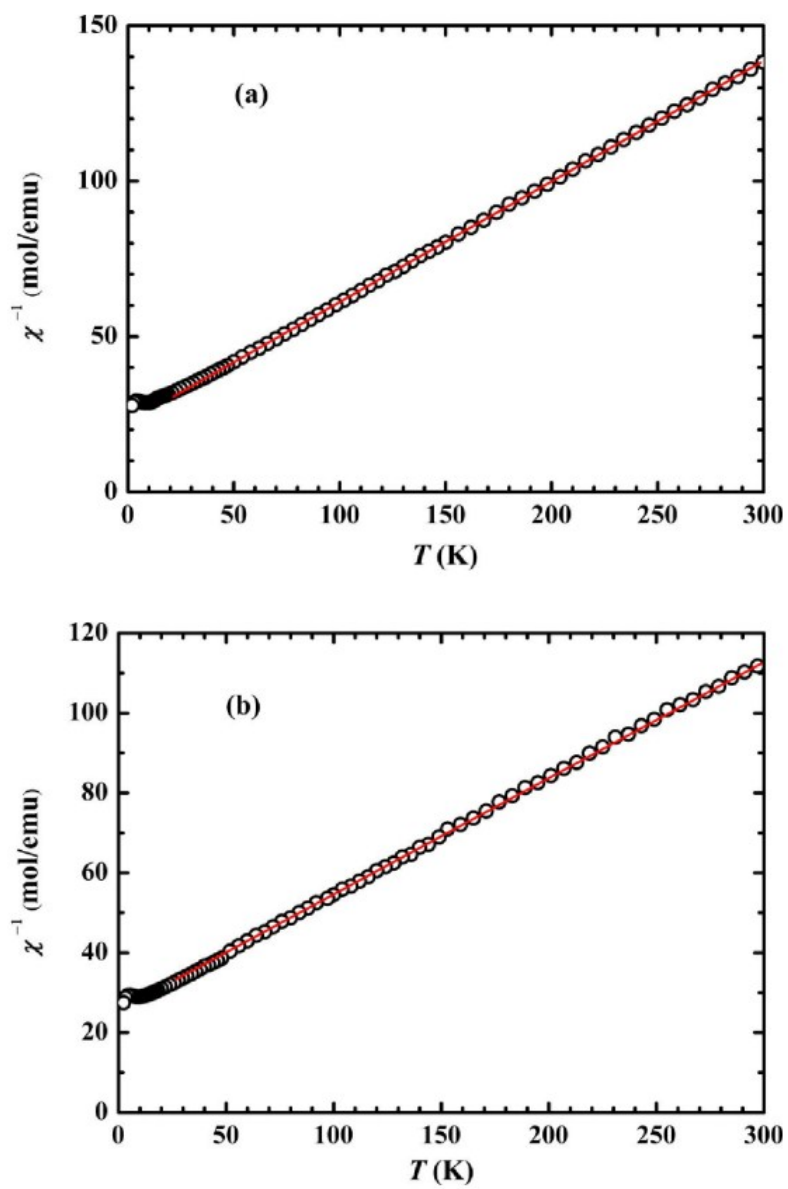

**Figure S2.** The  $\chi^{-1}$  versus  $T$  curves of  $\text{Sr}_2\text{Cu}_5(\text{PO}_4)_4\text{X}_2 \cdot 8\text{H}_2\text{O}$  [ $X =$  (a) Cl and (b) Br].

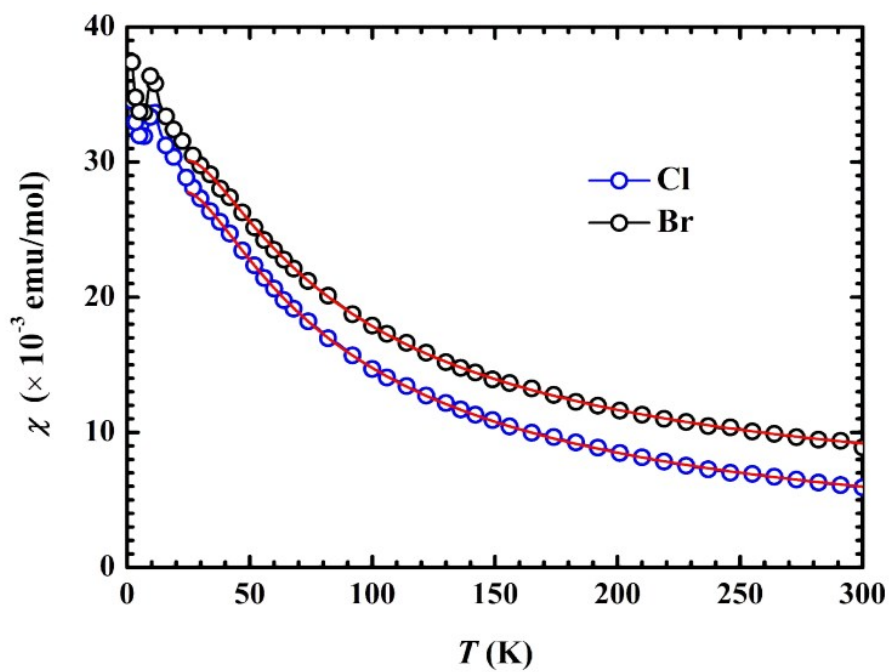

**Figure S3.** The fit of square-lattice Heisenberg antiferromagnetic spin model for magnetic susceptibility data of  $\text{Sr}_2\text{Cu}_5(\text{PO}_4)_4\text{X}_2 \cdot 8\text{H}_2\text{O}$  [X = (a) Cl and (b) Br].

**Table S1.** The Wyckoff positions, atomic coordinates ( $\times 10^4$ ) and equivalent isotropic displacement parameters ( $\text{\AA}^2 \times 10^3$ ) for  $\text{Sr}_2\text{Cu}_5(\text{PO}_4)_4\text{X}_2 \cdot 8\text{H}_2\text{O}$  ( $\text{X} = \text{Cl}, \text{Br}$ ).  $U(\text{eq})$  is defined as one third of the trace of the orthogonalized  $U_{ij}$  tensor.

| atom  | Wyck. | Site | x       | y       | z        | U(eq) |
|-------|-------|------|---------|---------|----------|-------|
| Cu(1) | 8g    | 1    | 7690(1) | 4862(1) | 10542(1) | 13(1) |
| Cu(2) | 2c    | 4..  | 10000   | 5000    | 7594(1)  | 12(1) |
| Cl(1) | 2c    | 4..  | 10000   | 5000    | 11778(2) | 19(1) |
| Cl(2) | 8g    | 1    | 10000   | 5000    | 5334(2)  | 39(1) |
| P(1)  | 8g    | 1    | 7791(1) | 6903(1) | 8613(1)  | 11(1) |
| O(1)  | 8g    | 1    | 8475(3) | 6342(3) | 9656(2)  | 12(1) |
| O(2)  | 8g    | 1    | 6841(3) | 3461(3) | 11450(3) | 14(1) |
| O(3)  | 8g    | 1    | 6628(3) | 6228(3) | 11326(3) | 17(1) |
| O(4)  | 8g    | 1    | 8315(3) | 6110(3) | 7644(2)  | 17(1) |
| O(5)  | 8g    | 1    | 9112(6) | 8176(5) | 5994(3)  | 62(1) |
| O(6)  | 8g    | 1    | 5893(6) | 7305(6) | 6287(4)  | 93(2) |
| Sr(1) | 4d    | 2..  | 10000   | 10000   | 7358(1)  | 24(1) |
| Cu(1) | 8i    | .m.  | 5195(1) | 7500    | 552(1)   | 15(1) |
| Cu(2) | 2c    | 4mm  | 2500    | 2500    | 2375(1)  | 9(1)  |
| Br(1) | 2c    | 4mm  | 7500    | 7500    | 1947(1)  | 15(1) |
| Br(2) | 2c    | 4mm  | 2500    | 2500    | 4745(1)  | 26(1) |
| P(1)  | 8j    | ..m  | 4552(1) | 4552(1) | 1372(1)  | 23(1) |
| O(1)  | 8j    | ..m  | 3929(2) | 3929(2) | 328(2)   | 14(1) |
| O(2)  | 16k   | 1    | 4231(2) | 6105(2) | 1375(2)  | 26(1) |
| O(3)  | 16k   | 1    | 4168(3) | 3622(3) | 2343(3)  | 11(1) |
| Sr(1) | 4f    | 2mm. | 2500    | 7500    | 2612(1)  | 16(1) |
| O(4A) | 16k   | 1    | 4604(5) | 6474(5) | 3786(4)  | 33(1) |
| O(4B) | 16k   | 1    | 1463(5) | 5723(4) | 3932(4)  | 37(1) |

**Table S2.** Anisotropic displacement parameters ( $\text{\AA}^2 \times 10^3$ ) for  $\text{Sr}_2\text{Cu}_5(\text{PO}_4)_4\text{X}_2 \cdot 8\text{H}_2\text{O}$  (X = Cl, Br). The anisotropic displacement factor exponent takes the form:  $-2 \pi^2 [ h^2 a^{*2} U11 + \dots + 2 h k a^* b^* U12 ]$ .

| atom  | U11    | U22    | U33   | U23    | U13    | U12    |
|-------|--------|--------|-------|--------|--------|--------|
| Cu(1) | 12(1)  | 8(1)   | 19(1) | 1(1)   | 3(1)   | 0(1)   |
| Cu(2) | 9(1)   | 9(1)   | 18(1) | 0      | 0      | 0      |
| Cl(1) | 18(1)  | 18(1)  | 22(1) | 0      | 0      | 0      |
| Cl(2) | 43(1)  | 43(1)  | 29(1) | 0      | 0      | 0      |
| P(1)  | 8(1)   | 9(1)   | 17(1) | -2(1)  | -1(1)  | 1(1)   |
| O(1)  | 10(1)  | 10(1)  | 16(1) | 0(1)   | -1(1)  | 0(1)   |
| O(2)  | 17(2)  | 9(2)   | 18(2) | -1(1)  | 4(1)   | 2(1)   |
| O(3)  | 15(2)  | 10(2)  | 25(2) | 1(1)   | 6(2)   | 2(1)   |
| O(4)  | 13(2)  | 17(2)  | 20(2) | -6(1)  | -1(1)  | 4(1)   |
| O(5)  | 119(4) | 34(2)  | 34(3) | 0(2)   | -19(3) | 7(3)   |
| O(6)  | 100(5) | 100(5) | 79(4) | 62(4)  | -41(3) | -56(4) |
| Sr(1) | 18(1)  | 38(1)  | 18(1) | 0      | 0      | 4(1)   |
| Cu(1) | 11(1)  | 26(1)  | 9(1)  | 0      | 3(1)   | 0      |
| Cu(2) | 8(1)   | 8(1)   | 13(1) | 0      | 0      | 0      |
| Br(1) | 15(1)  | 15(1)  | 13(1) | 0      | 0      | 0      |
| Br(2) | 29(1)  | 29(1)  | 20(1) | 0      | 0      | 0      |
| P(1)  | 31(1)  | 31(1)  | 6(1)  | 1(1)   | 1(1)   | -26(1) |
| O(1)  | 17(1)  | 17(1)  | 9(1)  | 0(1)   | 0(1)   | -7(1)  |
| O(2)  | 25(1)  | 33(1)  | 20(1) | -15(1) | 13(1)  | -18(1) |
| O(3)  | 10(2)  | 15(2)  | 7(2)  | 3(1)   | -1(1)  | -3(2)  |
| Sr(1) | 14(1)  | 25(1)  | 10(1) | 0      | 0      | 0      |
| O(4A) | 40(3)  | 31(3)  | 27(3) | -3(2)  | -8(2)  | 7(2)   |
| O(4B) | 62(3)  | 25(3)  | 23(3) | -1(2)  | 11(2)  | 0(2)   |

**Table S3.** Bond lengths [Å] and angles [deg] for Sr<sub>2</sub>Cu<sub>5</sub>(PO<sub>4</sub>)<sub>4</sub>Cl<sub>2</sub>·8H<sub>2</sub>O.

|                      |            |                      |            |
|----------------------|------------|----------------------|------------|
| Cu(1)-O(3)           | 1.932(3)   | Sr(1)-O(3)#8         | 2.560(3)   |
| Cu(1)-O(2)           | 1.941(3)   | Sr(1)-O(3)#6         | 2.560(3)   |
| Cu(1)-O(1)           | 1.956(3)   | Sr(1)-O(5)#9         | 2.591(5)   |
| Cu(1)-O(1)#1         | 1.968(3)   | Sr(1)-O(6)#10        | 2.730(5)   |
| Cu(1)-Cl(1)          | 2.709(2)   | Sr(1)-O(6)#3         | 2.730(5)   |
| P(1)-O(4)            | 1.515(3)   | Sr(1)-O(2)#8         | 2.748(3)   |
| P(1)-O(3)#5          | 1.531(3)   | Sr(1)-O(2)#6         | 2.748(3)   |
| P(1)-O(2)#6          | 1.544(3)   | Sr(1)-O(5)           | 2.591(4)   |
| P(1)-O(1)            | 1.553(3)   | Cu(2)-O(4)#4         | 1.945(3)   |
| Cu(2)-O(4)#3         | 1.945(3)   | Cu(2)-O(4)           | 1.945(3)   |
| Cu(2)-O(4)#1         | 1.945(3)   | Cu(2)-Cl(2)          | 2.817(3)   |
| O(3)-Cu(1)-O(2)      | 87.47(12)  | O(4)#3-Cu(2)-O(4)#1  | 176.29(19) |
| O(3)-Cu(1)-O(1)      | 89.61(13)  | O(4)#3-Cu(2)-O(4)#4  | 89.94(1)   |
| O(2)-Cu(1)-O(1)      | 177.02(12) | O(4)#1-Cu(2)-O(4)#4  | 89.94(1)   |
| O(3)-Cu(1)-O(1)#1    | 175.44(14) | O(4)#3-Cu(2)-O(4)    | 89.94(1)   |
| O(2)-Cu(1)-O(1)#1    | 93.16(12)  | O(4)#1-Cu(2)-O(4)    | 89.94(1)   |
| O(1)-Cu(1)-O(1)#1    | 89.69(15)  | O(4)#4-Cu(2)-O(4)    | 176.29(19) |
| O(3)-Cu(1)-Cl(1)     | 96.56(11)  | O(4)#3-Cu(2)-Cl(2)   | 91.85(10)  |
| O(2)-Cu(1)-Cl(1)     | 92.80(11)  | O(4)#1-Cu(2)-Cl(2)   | 91.85(10)  |
| O(1)-Cu(1)-Cl(1)     | 88.16(9)   | O(4)#4-Cu(2)-Cl(2)   | 91.85(10)  |
| O(1)#1-Cu(1)-Cl(1)   | 87.92(9)   | O(4)-Cu(2)-Cl(2)     | 91.85(10)  |
| O(4)-P(1)-O(3)#5     | 106.24(18) | O(5)#9-Sr(1)-O(6)#10 | 74.50(2)   |
| O(4)-P(1)-O(2)#6     | 111.91(18) | O(5)#9-Sr(1)-O(6)#3  | 67.91(15)  |
| O(3)#5-P(1)-O(2)#6   | 113.34(16) | O(5)#9-Sr(1)-O(2)#8  | 77.08(13)  |
| O(4)-P(1)-O(1)       | 110.50(16) | O(5)#9-Sr(1)-O(2)#6  | 159.04(14) |
| O(3)#5-P(1)-O(1)     | 108.37(19) | O(6)#10-Sr(1)-O(6)#3 | 121.40(2)  |
| O(2)#6-P(1)-O(1)     | 106.47(18) | O(6)#10-Sr(1)-O(2)#8 | 128.30(13) |
| O(3)#8-Sr(1)-O(3)#6  | 100.26(16) | O(6)#10-Sr(1)-O(2)#6 | 84.80(16)  |
| O(3)#8-Sr(1)-O(5)#9  | 122.17(14) | O(6)#3-Sr(1)-O(2)#8  | 84.80(16)  |
| O(3)#8-Sr(1)-O(6)#10 | 163.23(17) | O(6)#3-Sr(1)-O(2)#6  | 128.30(13) |
| O(3)#8-Sr(1)-O(6)#3  | 70.72(13)  | O(2)#8-Sr(1)-O(2)#6  | 114.53(14) |
| O(3)#8-Sr(1)-O(2)#8  | 60.47(8)   | O(5)-Sr(1)-O(3)#8    | 108.04(12) |
| O(3)#8-Sr(1)-O(2)#6  | 78.44(9)   | O(5)-Sr(1)-O(3)#6    | 122.17(14) |
| O(3)#6-Sr(1)-O(5)#9  | 108.04(12) | O(5)-Sr(1)-O(5)#9    | 97.90(2)   |
| O(3)#6-Sr(1)-O(6)#10 | 70.72(13)  | O(5)-Sr(1)-O(6)#10   | 67.91(15)  |
| O(3)#6-Sr(1)-O(2)#8  | 78.44(9)   | O(5)-Sr(1)-O(2)#8    | 159.04(14) |
| O(3)#6-Sr(1)-O(2)#6  | 60.47(8)   | O(5)-Sr(1)-O(2)#6    | 77.08(13)  |
| O(3)#6-Sr(1)-O(6)#3  | 163.23(17) | O(5)-Sr(1)-O(6)#3    | 74.50(2)   |

Symmetry transformations used to generate equivalent atoms:

|                      |                      |                      |
|----------------------|----------------------|----------------------|
| #1 -y+3/2,x-1/2,z    | #2 x-1/2,-y+3/2,-z+2 | #3 y+1/2,-x+3/2,z    |
| #4 -x+2,-y+1,z       | #5 y,x,-z+2          | #6 -x+3/2,y+1/2,-z+2 |
| #7 -x+3/2,y-1/2,-z+2 | #8 x+1/2,-y+3/2,-z+2 | #9 -x+2,-y+2,z       |
| #10 -y+3/2,x+1/2,z   |                      |                      |

**Table S4.** Bond lengths [Å] and angles [deg] for Sr<sub>2</sub>Cu<sub>5</sub>(PO<sub>4</sub>)<sub>4</sub>Br<sub>2</sub>·8H<sub>2</sub>O.

|                         |            |                        |            |
|-------------------------|------------|------------------------|------------|
| Cu(1)-O(2)#1            | 1.938(2)   | Sr(1)-O(4B)#15         | 2.587(5)   |
| Cu(1)-O(2)              | 1.938(2)   | Sr(1)-O(4B)#1          | 2.587(5)   |
| Cu(1)-O(1)#2            | 1.961(2)   | Sr(1)-O(4B)#9          | 2.587(5)   |
| Cu(1)-O(1)#3            | 1.961(2)   | Sr(1)-O(4B)            | 2.587(5)   |
| Cu(1)-Br(1)             | 2.832(1)   | Sr(1)-O(2)#9           | 2.649(2)   |
| P(1)-O(2)#5             | 1.535(2)   | Sr(1)-O(2)#15          | 2.649(2)   |
| P(1)-O(2)               | 1.535(2)   | Sr(1)-O(2)#1           | 2.649(2)   |
| P(1)-O(3)               | 1.556(3)   | Sr(1)-O(2)             | 2.649(2)   |
| P(1)-O(1)               | 1.560(3)   | Sr(1)-O(4A)#1          | 2.700(4)   |
| Cu(2)-O(3)              | 1.946(3)   | Sr(1)-O(4A)            | 2.700(4)   |
| Cu(2)-O(3)#6            | 1.946(3)   | Sr(1)-O(4A)#9          | 2.700(4)   |
| Cu(2)-O(3)#7            | 1.946(3)   | Sr(1)-O(4A)#15         | 2.700(4)   |
| Cu(2)-O(3)#8            | 1.946(3)   |                        |            |
| Cu(2)-Br(2)             | 2.964(2)   |                        |            |
| O(2)#1-Cu(1)-O(2)       | 88.34(13)  | O(3)-Cu(2)-O(3)#6      | 177.60(2)  |
| O(2)#1-Cu(1)-O(1)#2     | 176.64(10) | O(3)-Cu(2)-O(3)#7      | 89.98(1)   |
| O(2)-Cu(1)-O(1)#2       | 90.87(10)  | O(3)#6-Cu(2)-O(3)#7    | 89.98(1)   |
| O(2)#1-Cu(1)-O(1)#3     | 90.87(10)  | O(3)-Cu(2)-O(3)#8      | 89.98(1)   |
| O(2)-Cu(1)-O(1)#3       | 176.64(10) | O(3)#6-Cu(2)-O(3)#8    | 89.98(1)   |
| O(1)#2-Cu(1)-O(1)#3     | 89.74(15)  | O(3)#7-Cu(2)-O(3)#8    | 177.60(2)  |
| O(2)#1-Cu(1)-Br(1)      | 93.00(7)   | O(3)-Cu(2)-Br(2)       | 91.19(11)  |
| O(2)-Cu(1)-Br(1)        | 93.00(7)   | O(3)#6-Cu(2)-Br(2)     | 91.19(11)  |
| O(1)#2-Cu(1)-Br(1)      | 90.30(7)   | O(3)#7-Cu(2)-Br(2)     | 91.19(11)  |
| O(1)#3-Cu(1)-Br(1)      | 90.30(7)   | O(3)#8-Cu(2)-Br(2)     | 91.19(11)  |
| O(2)#5-P(1)-O(2)        | 113.38(16) | O(4B)#1-Sr(1)-O(2)#15  | 77.78(12)  |
| O(2)#5-P(1)-O(3)        | 96.58(13)  | O(4B)#1-Sr(1)-O(4B)    | 83.30(2)   |
| O(2)-P(1)-O(3)          | 121.09(15) | O(4B)#1-Sr(1)-O(4B)#9  | 100.70(2)  |
| O(2)#5-P(1)-O(1)        | 107.60(10) | O(4B)#1-Sr(1)-O(2)#9   | 117.77(13) |
| O(2)-P(1)-O(1)          | 107.60(10) | O(4B)#1-Sr(1)-O(2)#1   | 106.20(12) |
| O(3)-P(1)-O(1)          | 109.70(16) | O(4B)#1-Sr(1)-O(4A)#1  | 72.60(17)  |
| O(4B)#15-Sr(1)-O(4B)#1  | 45.70(2)   | O(4B)#1-Sr(1)-O(4A)    | 100.95(15) |
| O(4B)#15-Sr(1)-O(4B)#9  | 83.30(2)   | O(4B)#1-Sr(1)-O(4A)#9  | 66.70(15)  |
| O(4B)#15-Sr(1)-O(2)#9   | 163.07(12) | O(4B)#1-Sr(1)-O(4A)#15 | 27.81(15)  |
| O(4B)#15-Sr(1)-O(4B)    | 100.70(2)  | O(4B)#9-Sr(1)-O(2)#9   | 106.20(12) |
| O(4B)#15-Sr(1)-O(2)#15  | 106.20(11) | O(4B)#9-Sr(1)-O(4B)    | 45.70(2)   |
| O(4B)#15-Sr(1)-O(2)#1   | 77.78(12)  | O(4B)#9-Sr(1)-O(2)#15  | 163.07(12) |
| O(4B)#15-Sr(1)-O(4A)#15 | 72.60(17)  | O(4B)#9-Sr(1)-O(2)#1   | 117.77(13) |
| O(4B)#15-Sr(1)-O(4A)#1  | 27.81(15)  | O(4B)#9-Sr(1)-O(4A)#1  | 66.70(15)  |
| O(4B)#15-Sr(1)-O(4A)    | 66.70(15)  | O(4B)#9-Sr(1)-O(4A)    | 27.81(15)  |
| O(4B)#15-Sr(1)-O(4A)#9  | 100.95(15) | O(4B)#9-Sr(1)-O(4A)#9  | 72.60(17)  |
| O(4B)-Sr(1)-O(2)#9      | 77.78(12)  | O(4B)#9-Sr(1)-O(4A)#15 | 100.95(15) |
| O(4B)-Sr(1)-O(2)#1      | 163.07(12) | O(2)#9-Sr(1)-O(2)#15   | 61.27(8)   |



|                        |            |                        |            |
|------------------------|------------|------------------------|------------|
| O(4B)-Sr(1)-O(4A)#1    | 100.95(15) | O(2)#9-Sr(1)-O(2)#1    | 108.60(10) |
| O(4B)-Sr(1)-O(2)#15    | 117.77(13) | O(2)#9-Sr(1)-O(4A)     | 127.37(11) |
| O(4B)-Sr(1)-O(4A)      | 72.60(17)  | O(2)#9-Sr(1)-O(4A)#1   | 169.03(11) |
| O(4B)-Sr(1)-O(4A)#9    | 27.81(15)  | O(2)#9-Sr(1)-O(4A)#9   | 69.72(12)  |
| O(4B)-Sr(1)-O(4A)#15   | 66.70(15)  | O(2)#9-Sr(1)-O(4A)#15  | 91.61(12)  |
| O(2)#15-Sr(1)-O(2)#1   | 78.44(8)   | O(2)#1-Sr(1)-O(4A)#1   | 69.72(12)  |
| O(2)#15-Sr(1)-O(4A)#1  | 127.37(11) | O(2)#1-Sr(1)-O(4A)     | 91.61(12)  |
| O(2)#15-Sr(1)-O(4A)    | 169.04(11) | O(2)#1-Sr(1)-O(4A)#9   | 169.04(11) |
| O(2)#15-Sr(1)-O(4A)#9  | 91.61(12)  | O(2)#1-Sr(1)-O(4A)#15  | 127.37(11) |
| O(2)#15-Sr(1)-O(4A)#15 | 69.72(12)  | O(4A)-Sr(1)-O(4A)#9    | 97.90(2)   |
| O(4A)#1-Sr(1)-O(4A)    | 43.20(2)   | O(4A)-Sr(1)-O(4A)#15   | 114.10(2)  |
| O(4A)#1-Sr(1)-O(4A)#9  | 114.10(2)  | O(4A)#9-Sr(1)-O(4A)#15 | 43.20(2)   |
| O(4A)#1-Sr(1)-O(4A)#15 | 97.90(2)   | O(2)-Sr(1)-O(2)#1      | 61.27(8)   |
| O(2)-Sr(1)-O(4B)#15    | 117.77(13) | O(2)-Sr(1)-O(4A)#1     | 91.61(12)  |
| O(2)-Sr(1)-O(4B)#1     | 163.07(12) | O(2)-Sr(1)-O(4A)       | 69.72(12)  |
| O(2)-Sr(1)-O(4B)#9     | 77.78(12)  | O(2)-Sr(1)-O(4A)#9     | 127.37(11) |
| O(2)-Sr(1)-O(4B)       | 106.20(11) | O(2)-Sr(1)-O(4A)#15    | 169.03(11) |
| O(2)-Sr(1)-O(2)#9      | 78.44(8)   | O(2)-Sr(1)-O(2)#15     | 108.60(10) |

Symmetry transformations used to generate equivalent atoms:

|                         |                       |                         |
|-------------------------|-----------------------|-------------------------|
| #1 $x, -y+3/2, z$       | #2 $-x+1, -y+1, -z$   | #3 $-y+1, x+1/2, -z$    |
| #4 $-y+1/2, -x+1/2, z$  | #5 $y, x, z$          | #6 $-x+1/2, -y+1/2, z$  |
| #7 $y, -x+1/2, z$       | #8 $-y+1/2, x, z$     | #9 $-x+1/2, y, z$       |
| #10 $x, -y+1/2, z$      | #11 $-y+3/2, x, z$    | #12 $y, -x+3/2, z$      |
| #13 $-x+3/2, -y+3/2, z$ | #14 $y-1/2, -x+1, -z$ | #15 $-x+1/2, -y+3/2, z$ |
